# Supplementary material for: Acute ventilatory responses to swimming at increasing intensities
Source: PeerJ. 2023 Mar 13;11:e15042. doi: 10.7717/peerj.15042 (PMC10019328; doi:10.7717/peerj.15042)
Supplement: Supplemental Information 1 — Ventilatory and performance variable responses along the swimming intensity domains. [file peerj-11-15042-s001.xlsx]

## Sheet: Folha1
ID	sex	age	height	weight	v_low	v_moderate	v_heavy	v_severe	v_extreme	SR_low	SR_moderate	SR_heavy	SR_severe	SR_extreme	SL_low	SL_moderate	SL_heavy	SL_severe	SL_extreme	La_low	La_moderate	La_heavy	La_severe	La_extreme	VO2kg_low	VO2kg_moderate	VO2kg_heavy	VO2kg_severe	VO2kg_extreme	VCO2kg_low	VCO2kg_moderate	VCO2kg_heavy	VCO2kg_severe	VCO2kg_extreme	VE_low	VE_moderate	VE_heavy	VE_severe	VE_extreme	RF_low	RF_moderate	RF_heavy	RF_severe	RF_extreme	VT_low	VT_moderate	VT_heavy	VT_severe	VT_extreme
1	female	15	170	65.4	1.04	1.13	1.28	1.33	1.45	25.14	28.6	33.48	35.58	40.25	2.4821	2.37063	2.29391	2.24283	2.16149	2	2	3.6	8.2	10.3	26.1263	33.0692	43.118	46.2941	45.8468	22.6469	29.1213	40.7191	47.8058	41.7139	39.5524	49.7989	67.884	91.3786	77.2678	22.5266	30.1908	36.0809	52.7736	44.434	1.76575	1.71421	1.89138	1.76636	1.75008
2	female	15	170	67	1.11	1.17	1.2	1.23	1.33	32.05	34.3	35.6	35.25	38	2.15813	2.05083	2.02304	2.00762	1.996	2.4	2.7	3.7	5.4	5.8	33.0857	37.1656	40.5918	43.3027	44.3167	29.4472	34.9184	38.8905	43.1374	41.0524	62.6137	75.9873	81.892	92.7343	90.6875	36.1869	40.8067	44.1271	48.5449	49.4098	1.74881	1.87818	1.87831	1.93146	1.8448
3	male	16	169	55.2	1.04	1.13	1.22	1.26	1.37	22.61	25.34	28.73	29.91	35.6	2.75984	2.67561	2.54786	2.52758	2.30899	2.8	3.5	5.6	7.9	9.8	41.7369	49.2445	54.2707	59.046	60.5662	35.8623	44.5413	51.6492	57.0343	61.1637	50.3136	66.8311	84.2064	102.93	109	27.4461	33.8465	39.6447	50.3562	52.7345	1.92276	1.974	2.13121	2.06977	2.08745
4	male	17	182	68.9	1.29	1.39	1.43	1.44	1.52	33.15	37.4	40.5	41.2	42.5	2.27647	2.25162	2.17711	2.09404	2.08219	4.9	6.6	7.4	8.9	11	59.7347	69.3711	73.0626	75.6514	69.3302	48.2472	54.1756	61.9887	64.3202	52.1336	91.9076	95.6284	113.079	117.836	118.319	31.6903	31.9761	38.8841	41.3802	46.6222	2.91257	2.99806	2.91139	2.8523	2.5552
5	male	17	174	77.2	1.18	1.28	1.37	1.43	1.52	27.85	31.85	36.45	40.6	42.45	2.534	2.43578	2.32729	2.28495	2.15094	3	3.6	9.3	10.9	14.4	44.9202	55.1481	58.8279	66.488	62.0289	38.3115	47.3387	44.1803	56.6437	48.0668	77.7384	102.309	99.091	135.303	126.973	26.8604	34.2898	41.4489	45.1602	44.4023	2.92698	3.02192	2.4659	3.0096	2.87331
6	female	18	167	57.4	0.95	1.07	1.17	1.21	1.31	23.66	26.85	31.43	33.73	38.53	2.40913	2.39106	2.23353	2.15239	2.03997	3.5	3.8	6.6	12.6	14.4	33.5763	37.5982	44.2354	47.2922	48.5441	30.1083	37.0496	48.4442	52.4077	54.9836	47.2588	62.9644	89.8212	101.702	109.216	33.81	38.5055	46.8017	47.3385	51.5191	1.40669	1.63613	1.94214	2.15408	2.12884
7	male	18	181	77.5	1.13	1.23	1.29	1.33	1.58	21.5	24.15	25.9	27.5	43.35	3.28329	3.13909	3.1865	2.95446	2.26361	3.5	4.8	7.2	9.7	18.2	42.7907	48.3888	52.2695	55.2317	55.9287	37.6203	46.383	53.9332	56.7165	57.5136	69.7927	83.7612	104.555	105.583	116.633	23.3361	29.6115	39.0693	36.2005	44.8629	3.01221	2.99922	2.95561	3.01038	2.78681
8	male	36	185	83.6	1	1.11	1.22	1.27	1.39	18.73	20.89	26.44	31.83	38.95	3.20342	3.18813	2.76853	2.39397	2.14121	2.7	2.7	4.7	7.1	8.6	35.3247	44.4942	56.5357	59.1213	60.4001	30.2385	38.6825	51.4279	54.9545	55.2423	71.5117	92.3776	124.783	135.055	146.039	24.6638	27.5979	33.9421	38.0148	42.938	2.97071	3.3701	3.69026	3.56287	3.40804
9	female	18	160	48.1	0.85	0.95	1.03	1.07	1.18	25.4	28.7	31.05	33.8	36.4	1.96078	2.00634	1.94646	1.97782	1.88048	2	2.9	5.8	6.7	12.2	29.2386	36.4682	41.1774	43.5264	43.835	25.0053	34.2962	41.1043	45.4048	42.3296	33.6448	47.4465	64.3676	74.3424	76.8102	31.7051	47.2941	60.6935	67.2486	73.1065	1.09549	1.01316	1.06456	1.10945	1.05853
10	female	18	166	60	0.9	1	1.09	1.12	1.21	23.3	26.35	30.9	32.8	36.35	2.33463	2.40674	2.24434	2.204	1.96855	3.7	3.1	5.3	7.6	10.6	26.7084	33.9114	41.2113	44.3516	45.9845	22.088	30.2829	36.6072	41.01	42.0022	36.3372	51.1039	66.5003	71.4126	77.226	18.6552	23.7672	31.9475	36.4008	37.499	1.96306	2.17264	2.10238	2.00669	2.06165
11	female	18	159	57.9	0.94	1.04	1.16	1.24	1.33	22.71	25.5	31.28	35.16	40.85	2.48349	2.44706	2.22506	2.11604	1.95349	1.8	2.2	4.4	6.1	11.8	23.5809	31.144	38.1058	43.6544	42.7368	20.2213	27.677	36.9012	42.711	41.3276	37.3256	48.1922	71.0209	87.0293	85.2062	23.0921	25.2982	38.9861	46.5352	47.2861	1.62572	1.91256	1.83291	1.87615	1.80484
12	female	19	159	56.8	0.98	1.07	1.16	1.18	1.26	25.69	28.66	32.04	32.99	36.43	2.28883	2.24006	2.17228	2.1461	2.07521	1.9	2.7	5.5	10.2	10.7	29.3213	34.512	38.9058	41.4549	41.7271	25.7285	31.9836	38.9494	42.2289	42.2758	43.5827	58.389	75.9644	84.0964	90.8617	44.1201	51.4943	54.0789	54.9118	61.0693	1.00763	1.14681	1.41387	1.53796	1.49781
13	male	29	184	70.3	1.13	1.22	1.32	1.36	1.44	27.83	31.73	36.21	38.89	43.55	2.43622	2.30697	2.18724	2.09823	1.98393	3	3.6	5.9	7.1	10.7	39.2182	46.0371	54.7947	58.3799	59.0684	34.8431	41.0511	49.7317	54.2445	52.0454	70.7916	79.3104	94.7338	104.192	106.329	29.5194	37.5503	36.9316	41.329	43.7565	2.39929	2.25519	2.56798	2.52425	2.44246
14	female	16	160	48.5	1.05	1.15	1.2	1.25	1.43	29.96	33.44	34.58	37.45	45.4	2.1028	2.0634	2.08213	2.00267	1.88987	1.7	2.4	3.2	5	9.5	36.5059	38.9175	41.6422	45.6785	47.8416	29.9789	33.1987	35.8865	42.0909	46.531	49.0335	56.0673	61.9643	74.0799	86.3583	30.136	33.1583	35.2349	39.7741	54.8065	1.63886	1.70393	1.76326	1.87839	1.58509
15	male	16	164	50.3	1.1	1.2	1.24	1.31	1.51	32.9	35.84	36.14	39.64	49.25	2.00608	2.00893	2.05866	1.98285	1.83959	2.4	2.5	2.9	8	13	45.9176	53.3883	58.0045	62.8271	61.8512	37.3964	43.7968	50.205	60.2562	60.7707	49.577	57.3075	69.6684	93.0769	100.938	30.6337	33.4	40.8307	52.6393	59.2007	1.62785	1.70737	1.70525	1.77242	1.71956
16	male	14	174	57.4	1.05	1.15	1.2	1.29	1.45	27.4	30.66	32.99	34.65	40.58	2.29927	2.25049	2.18248	2.23377	2.14391	2.8	3.7	4.9	11.7	14.2	46.5683	57.2119	58.2826	62.2264	61.0159	40.0079	50.1834	52.8757	57.2623	51.8617	56.9388	78.926	85.6944	86.3035	89.597	20.9286	32.7864	40.4645	42.5121	48.1989	2.69317	2.42042	2.15346	2.04318	1.87891
17	female	14	160	54.3	1.01	1.08	1.14	1.21	1.33	31.01	34.03	34.34	38.68	43.68	1.95421	1.9042	1.99185	1.87694	1.82692	1.9	2.7	3.7	6.7	8.7	40.5856	41.2618	51.5654	55.5746	52.2884	37.5843	41.8428	47.0595	57.534	53.5093	61.1937	67.6506	66.8411	86.9604	83.591	43.1329	45.2787	38.4873	49.3157	47.4075	1.40335	1.47307	1.72327	1.75752	1.74496
18	male	15	176	55	0.961538	1.05	1.1976	1.21212	1.39	21.24	26.03	31.9	34.01	43.25	2.71621	2.42028	2.25255	2.13841	1.92832	2.5	3	6.5	8.1	10.9	40.9536	44.2217	50.2048	52.8417	52.4378	33.7967	39.3989	48.0342	50.9725	50.9635	55.8827	65.5448	82.59	90.2161	99.1683	24.8479	29.6463	35.9074	37.5784	45.1608	2.27782	2.22729	2.36769	2.41541	2.203
[truncated: 5 more columns]
